# Supplementary material
Source: Royal Society of Chemistry journal article supplement (doi:10.1039/d6fo00158k)
Supplement: d6fo00158k2.xlsx [file d6fo00158k2.xlsx]

## Sheet: Table S1
Table S1. Rank-based estimation regression estimates for polyphenol intake (mg/1000 kcal) in relation to the abundance of microbial genera with PUP genes. Models accounted for age, sex, body mass index, fiber intake, and total diet quality. All p-values were adjusted for multiple testing (Bonferroni-Hochberg) with padj <= 0.05 shown. Taxonomic composition was determined using MetaPhlAn.
Diet Resolution	Polyphenol (FooDB ID)	Genus	Estimate	padj
Class	Flavanols (Flavan-3-ols)	Clostridium	0.047	0.033
	Flavones	Gemmiger	0.052	<0.001
	Flavonols	Gordonibacter	0.000457	0.001
	Flavones		0.001	<0.001
	Flavonols	Mediterraneibacter	0.019	0.015
Compound	Biochanin A (FDB012223)	Anaerobutyricum	-24.486	0.022
	Apigenin (FDB002798)*	Erysipelatoclostridium	0.003	<0.001
	Naringin (FDB011866)*	Faecalibacillus	0.031	0.006
	Hesperetin 7-neohesperidoside (FDB002679)*		1.089	0.006
	3,4',5,6,7,8-Hexahydroxyflavone (FDB021746)	Flavonifractor	0.678	0.005
	Apigenin (FDB002798)*	Gemmiger	0.057	<0.001
	Quercetin (FDB011904)*	Gordonibacter	0.001	<0.001
	Apigenin (FDB002798)*		0.001	<0.001
	Naringin (FDB011866)*		0.001	0.047
	Naringin (FDB011866)*	Lachnospira	0.061	<0.001
	Hesperetin 7-neohesperidoside (FDB002679)*		2.586	<0.001
	Quercetin (FDB011904)*	Mediterraneibacter	0.024	0.029
	Kaempferol (FDB000633)*		0.076	0.025
	Naringin (FDB011866)*	Streptococcus	0.073	<0.001
	Hesperetin 7-neohesperidoside (FDB002679)*		2.724	<0.001
*Polyphenol listed as an experimentally verified substrate for one or more PUPs in dbPUP.

## Sheet: Table S2
Table S2. Summary of covariate effects from rank-based regression models examining polyphenols (mg/1000 kcal) in relation to the abundance of microbial genera with PUP genes. Each model tested a different polyphenol, with the same covariates (age, sex, body mass index, fiber intake, and diet quality) included in all models. Values shown represent covariate estimates summarized across one or more …
Diet Resolution	Model Count	Genus	Variable	min. Estimate	max Estimate	min padj	max padj
Class	7	Blautia	Sex, Male	-1.129	-1.033	0.03	0.043
	7	Dorea	BMI (kg/m2)	0.027	0.028	0.045	0.045
Compound	28	Blautia	Sex, Male	-1.115	-1.038	0.036	0.041

## Sheet: Table S3
Table S3. Rank-based estimation regression estimates for polyphenol intake (mg/1000 kcal) in relation to polyphenol utilization protein (PUP) counts. Models accounted for age, sex, body mass index, fiber intake, and total diet quality. All p-values were adjusted for multiple testing (Bonferroni-Hochberg) with padj <= 0.05 shown.
Diet Resolution	Polyphenol (FooDB ID)	Genus	PUP (Uniprot)	Estimate	padj
Total	Total polyphenol	Lachnospira	Beta-glucosidase (J9XU85)	0.004	<0.001
	Total polyphenol	Roseburia	Phloretin hydrolase (Q715L4)	0.004	0.011
	Total polyphenol	Streptococcus	NADH-dependent flavin reductase subunit 1 (Q74HL7)	0.001	0.042
Class	Isoflavonoids	Bacteroides	Alpha-L-rhamnosidase (Q76LC4)	0.06	<0.001
	Flavones	Erysipelatoclostridium	Beta-glucosidase (A0A072MSE8)	0.447	<0.001
	Isoflavonoids	Faecalibacterium	Alpha-L-rhamnosidase (Q9S3L0)	0.107	0.003
	Isoflavonoids		Alpha-L-rhamnosidase A (Q6RCI9)	0.136	<0.001
	Stilbenes		Glycosyl transferase Family 1 (Q65JC2)	2.025	0.003
	Flavones	Faecalicatena	Beta-glucosidase (A0A072N4Q2)	0.086	<0.001
	Flavones	Flavonifractor	Enoate reductase (V9P074)	1.333	0.011
	Isoflavonoids	Fusicatenibacter	Alpha-L-rhamnosidase (X2CNV1)	0.018	0.047
	Flavones	Gemmiger	Beta-glucosidase (J9XU85)	1.064	<0.001
	Chalcones and Dihydrochalcones	Mediterraneibacter	Daidzein and genistein reductase (A0A0U1WKA6)	22.433	0.027
	Flavanones	Phocaeicola	Beta-D-glucosideglucohydrolase (A0A072MRT2)	0.057	<0.001
	Flavanones		Beta-glucosidase (A0A072N4Q2)	0.012	0.003
	Isoflavonoids	Roseburia	Putative dehydrogenase (I5AX46)	0.692	<0.001
	Flavonols	Streptococcus	Alternansucrase (Q9RE05)	0.447	<0.001
	Flavonols		Dextransucrase (Q9ZAR4)	0.547	0.038
	Flavones	Subdoligranulum	Alpha-L-rhamnosidase (X2CNV1)	0.246	0.033
Compound	Diosmetin 7-rutinoside (FDB000693)	Agathobacter	Glycoside hydrolase, family 3 domain protein (A1S0B1)	50.722	<0.001
	Naringin (FDB011866)*	Alistipes	Alpha-L-rhamnosidase (Q9S3L0)	0.845	0.033
	Hesperetin 7-neohesperidoside (FDB002679)			29.869	0.04
	Naringin (FDB011866)*		Alpha-L-rhamnosidase A (Q6RCI9)	0.689	<0.001
	Hesperetin 7-neohesperidoside (FDB002679)			29.74	<0.001
	Genistin (FDB012221)*		Beta-glucosidase (A0A072N4Q2)	0.15	0.013
	Daidzein (FDB002608)			0.178	0.006
	6''-Malonylgenistin (FDB000670)			0.259	0.011
	Hesperidin (FDB002680)*	Bacteroides	Glycoside hydrolase family protein (F6IEX3)	0.105	0.001
	Diosmetin 7-rutinoside (FDB000693)	Barnesiella	Glycoside hydrolase, family 3 domain protein (A1S0B1)	16.556	<0.001
	Daidzein (FDB002608)	Bifidobacterium	Alpha-L-rhamnosidase (X2CNV1)	54.336	0.002
	Apigenin (FDB002798)	Bilophila	Daidzein-to-DHD conversion enzyme (H3JUE4)	0.448	0.039
	3,4',5,6,7,8-Hexahydroxyflavone (FDB021746)			93.731	0.042
	Naringin (FDB011866)*	Blautia	Alpha-L-rhamnosidase (Q9S3L0)	4.581	0.017
	Hesperetin 7-neohesperidoside (FDB002679)			192.736	0.017
	Myricetin (FDB012724)		Alpha-L-rhamnosidase (X2CNV1)	-1.605	0.033
	3,4',5,6,7,8-Hexahydroxyflavone (FDB021746)	Catenibacterium	Beta-glucosidase (J9XU85)	2698.09	0.034
	Naringin (FDB011866)	Clostridium	Alpha-L-rhamnosidase (C4PG47)	6.812	0.002
	Hesperetin 7-neohesperidoside (FDB002679)			306.733	<0.001
	Quercetin (FDB011904)		Alpha-L-rhamnosidase (Q9S3L0)	0.181	0.04
	Kaempferol (FDB000633)			0.769	0.017
	Genistin (FDB012221)			0.532	0.026
	Daidzein (FDB002608)			0.627	0.017
	Naringin (FDB011866)		Glycoside hydrolase, family 3 domain protein (A1S0B1)	1.362	<0.001
	Hesperetin 7-neohesperidoside (FDB002679)			60.18	<0.001
	Diosmetin 7-rutinoside (FDB000693)		Sucrose phosphorylase (A0ZZH6)	6.578	0.039
	Naringin (FDB011866)	Coprobacillus	Beta-glucosidase (J9XU85)	0.554	<0.001
	Hesperetin 7-neohesperidoside (FDB002679)			21.887	<0.001
	Coumestrol (FDB011663)		Daidzein-to-DHD conversion enzyme (H3JUE4)	45.349	0.025
	Coumestrol (FDB011663)	Coprococcus	Alpha-L-rhamnosidase (Q9S3L0)	4.542	0.04
	Piceatannol (FDB012295)			35.369	0.017
	5-8'-Dehydrodiferulic acid (FDB000264)		Beta-glucosidase (A0A072MSE8)	3.058	0.006
	Luteolin (FDB013255)	Dorea	Beta-glucosidase (J9XU85)	0.896	0.031
	Diosmetin 7-rutinoside (FDB000693)		Enoate reductase (V9P074)	3.825	0.004
	Diosmetin 7-rutinoside (FDB000693)		Alpha-L-rhamnosidase B2 (C4PG45)	90.359	<0.001
	3,4',5,6,7,8-Hexahydroxyflavone (FDB021746)	Eisenbergiella	Alpha-L-rhamnosidase (Q9S3L0)	3470.06	<0.001
	Apigenin (FDB002798)	Erysipelatoclostridium	Beta-glucosidase (A0A072MSE8)	0.484	<0.001
	Genistein (FDB011828)	Faecalibacterium	Alpha-L-rhamnosidase (Q9S3L0)	0.336	0.02
	Genistein (FDB011828)		Alpha-L-rhamnosidase A (Q6RCI9)	0.262	0.011
	5-8'-Dehydrodiferulic acid (FDB000264)		Glycosyl transferase Family 1 (Q65JC2)	1.993	0.045
	(E)-Resveratrol 3-glucoside (FDB002449)			8.385	0.045
	Apigenin (FDB002798)	Faecalicatena	Beta-glucosidase (A0A072MSE8)	0.38	<0.001
	Quercetin 3-rutinoside (FDB002536)		Beta-glucosidase (A0A072N4Q2)	0.023	0.044
	Apigenin (FDB002798)			0.091	<0.001
	Daidzein (FDB002608)	Fusicatenibacter	Alpha-L-rhamnosidase (X2CNV1)	0.079	0.034
	3,4',5,6,7,8-Hexahydroxyflavone (FDB021746)	Gemmiger	Alpha-L-rhamnosidase (X2CNV1)	259.05	<0.001
	Morin (FDB002736)			269.519	0.003
	Naringin (FDB011866)		Beta-glucosidase (A0A072MX70)	1.542	0.025
	Narirutin (FDB011868)			4.144	0.005
	Apigenin (FDB002798)		Beta-glucosidase (J9XU85)	1.387	<0.001
	Apigenin (FDB002798)	Lachnospira	Beta-glucosidase (J9XU85)	0.979	<0.001
	Naringin (FDB011866)			0.379	0.008
	Hesperetin 7-neohesperidoside (FDB002679)			16.567	0.008
	3,4',5,6,7,8-Hexahydroxyflavone (FDB021746)	Lacrimispora	Amylosucrase (Q9ZEU2)	625.09	0.009
	Isorhamnetin (FDB000604)	Mediterraneibacter	Alpha-L-rhamnosidase (Q9S3L0)	6.585	0.017
	Diosmetin 7-rutinoside (FDB000693)		Alpha-L-rhamnosidase A (Q6RCI9)	17.929	0.002
	Isorhamnetin (FDB000604)		Beta-glucosidase (A0A072MX70)	14.04	<0.001
	Diosmetin 7-rutinoside (FDB000693)		Beta-glucosidase (J9XU85)	11.547	<0.001
	Genistin (FDB012221)	Parabacteroides	Alpha-L-rhamnosidase (X2CNV1)	0.078	0.033
	Daidzein (FDB002608)			0.093	0.011
	(S)-Naringenin (FDB000678)	Phocaeicola	Beta-D-glucosideglucohydrolase (A0A072MRT2)	0.065	<0.001
	Hesperidin (FDB002680)*			0.406	<0.001
	Narirutin (FDB011868)			2.207	0.006
	(S)-Naringenin (FDB000678)		Beta-glucosidase (A0A072N4Q2)	0.014	0.008
	Kaempferol (FDB000633)	Roseburia	Alpha-L-rhamnosidase (Q9S3L0)	1.697	0.02
	Daidzein (FDB002608)			0.733	0.017
	6''-Malonylgenistin (FDB000670)			1.054	0.023
	Daidzein (FDB002608)		Beta-glucosidase (A0A072N4Q2)	0.351	0.047
	Naringin (FDB011866)		Phloretin hydrolase (Q715L4)	0.335	0.019
	Diosmetin 7-rutinoside (FDB000693)			12.931	<0.001
	Hesperetin 7-neohesperidoside (FDB002679)			15.209	0.008
	Morin (FDB002736)			371.192	0.038
	Genistein (FDB011828)		Putative dehydrogenase (I5AX46)	1.456	0.02
	Daidzein (FDB002608)			2.275	0.02
	Hesperidin (FDB002680)		Sucrose phosphorylase (A0ZZH6)	0.297	<0.001
	Narirutin (FDB011868)			1.699	<0.001
	3,4',5,6,7,8-Hexahydroxyflavone (FDB021746)			273.225	0.039
	Diosmetin 7-rutinoside (FDB000693)	Ruminococcus	DfgC (A0A0E3TKF2)	292.739	0.011
	Quercetin (FDB011904)*	Streptococcus	Alternansucrase (Q9RE05)	0.557	0.002
	Kaempferol (FDB000633)			1.819	0.002
	Genistin (FDB012221)			1.405	0.048
	Daidzein (FDB002608)			2.918	<0.001
	6''-Malonylgenistin (FDB000670)			2.83	0.004
	Quercetin (FDB011904)*		Dextransucrase (Q9ZAR4)	0.726	0.023
	Kaempferol (FDB000633)			2.287	0.05
	Genistin (FDB012221)			2.4	0.023
	Daidzein (FDB002608)			4.693	<0.001
	6''-Malonylgenistin (FDB000670)			3.941	0.023
	Genistin (FDB012221)		NADH-dependent flavin reductase subunit 1 (Q74HL7)	0.242	0.002
	Daidzein (FDB002608)			0.254	0.001
	6''-Malonylgenistin (FDB000670)			0.354	0.004
	Glycitein (FDB000698)			1.191	0.002
	Apigenin (FDB002798)	Subdoligranulum	Alpha-L-rhamnosidase (X2CNV1)	0.289	0.008
	Apigenin (FDB002798)		Alpha-L-rhamnosidase A (Q6RCI9)	1.152	0.002
	3,4',5,6,7,8-Hexahydroxyflavone (FDB021746)		Amylosucrase (Q9ZEU2)	774.298	0.009
	Diosmetin 7-rutinoside (FDB000693)		Beta-glucosidase (A0A072MX70)	48.212	<0.001
	Apigenin (FDB002798)		Beta-glucosidase (A0A072N4Q2)	0.568	<0.001
	Apigenin (FDB002798)		Glycoside hydrolase, family 3 domain protein (A1S0B1)	1.143	<0.001
*Polyphenol listed as an experimentally verified substrate for the specific polyphenol utilization protein in dbPUP.

## Sheet: Table S4
Table S4. Summary of covariate effects from rank-based regression models examining polyphenol intake (mg/1000 kcal) in relation to polyphenol utilization protein (PUP) counts. Each model tested a different polyphenol, with the same covariates (age, sex, body mass index, fiber intake, and diet quality) included in all models. Values shown represent covariate estimates summarized across one or more…
Diet Resolution	Model Count	Genus	PUP (Uniprot)	Variable	min. Estimate	max Estimate	min padj	max padj
Total	1	Alistipes	Glycoside hydrolase family protein (F6IEX3)	BMI (kg/m2)	0.143	0.143	0.046	0.046
	1	Bilophila	Daidzein-to-DHD conversion enzyme (H3JUE4)	Fiber (g/1000 kcal)	0.12	0.12	0.029	0.029
	1	Clostridium	Enoate reductase (V9P074)	BMI (kg/m2)	0.165	0.165	0.001	0.001
	1	Eubacterium	Chalcone isomerase (V9P0A9)	BMI (kg/m2)	0.884	0.884	0.006	0.006
	1	Fusicatenibacter	Alpha-L-rhamnosidase (X2CNV1)	BMI (kg/m2)	0.076	0.076	0.015	0.015
	1	Lacrimispora	Beta-glucosidase (A0A072N4Q2)	Sex, Male	3.996	3.996	0.048	0.048
Class	6	Bilophila	Daidzein-to-DHD conversion enzyme (H3JUE4)	Fiber (g/1000 kcal)	0.107	0.132	0.035	0.04
	7	Clostridium	Enoate reductase (V9P074)	BMI (kg/m2)	0.165	0.173	0.001	0.002
	7	Eubacterium	Chalcone isomerase (V9P0A9)	BMI (kg/m2)	0.852	0.892	0.007	0.009
	7	Fusicatenibacter	Alpha-L-rhamnosidase (X2CNV1)	BMI (kg/m2)	0.074	0.078	0.042	0.05
	2	Parabacteroides	Alpha-L-rhamnosidase (X2CNV1)	BMI (kg/m2)	0.049	0.054	0.046	0.046
Compound	27	Bilophila	Daidzein-to-DHD conversion enzyme (H3JUE4)	Fiber (g/1000 kcal)	0.115	0.147	0.004	0.044
	2	Clostridium	Daidzein-to-DHD conversion enzyme (H3JUE4)	Age	0.088	0.091	0.044	0.044
	29	Clostridium	Enoate reductase (V9P074)	BMI (kg/m2)	0.163	0.181	0.001	0.001
	1	Coprococcus	Alpha-L-rhamnosidase (Q9S3L0)	Total HEI-2015 Score	0.444	0.444	0.017	0.017
	29	Eubacterium	Chalcone isomerase (V9P0A9)	BMI (kg/m2)	0.825	0.902	0.007	0.01
	1	Flavonifractor	Chalcone isomerase (V9P0A9)	Sex, Male	-6.297	-6.297	0.049	0.049
	26	Fusicatenibacter	Alpha-L-rhamnosidase (X2CNV1)	BMI (kg/m2)	0.072	0.08	0.029	0.042
	1	Lacrimispora	Beta-glucosidase (A0A072N4Q2)	Sex, Male	4.013	4.013	0.049	0.049
	6	Parabacteroides	Alpha-L-rhamnosidase (X2CNV1)	BMI (kg/m2)	0.051	0.055	0.033	0.05

## Sheet: Table S5
Table S5. Spearman correlations between polyphenol intake (mg/1000 kcal) and the abundance of microbial genera with PUP genes. All p-values were adjusted for multiple testing (Bonferroni-Hochberg) with padj <= 0.05 shown. Taxonomic composition was determined using MetaPhlAn.
Diet Resolution	Polyphenol (FooDB ID)	Genus	Estimate	padj
Class	Flavones	Alistipes	0.159	0.033
	Isoflavonoids	Bacteroides	0.163	0.027
	Flavonols	Bifidobacterium	-0.161	0.03
	Flavonols	Clostridium	0.165	0.023
	Flavanols (Flavan-3-ols)		0.146	0.035
	Isoflavonoids	Collinsella	-0.146	0.034
	Stilbenes		-0.191	0.005
	Flavanones	Lachnospira	0.134	0.036
	Isoflavonoids		0.121	0.046
	Flavonols		0.166	0.014
	Flavones		0.131	0.036
	Stilbenes		0.162	0.014
Compound	Apigenin (FDB002798)*	Bifidobacterium	-0.166	0.047
	Kaempferol (FDB000633)*		-0.183	0.034
	Kaempferol (FDB000633)*	Clostridium	0.203	0.008
	Coumestrol (FDB011663)	Collinsella	-0.202	0.005
	5-8'-Dehydrodiferulic acid (FDB000264)		-0.225	0.002
	Myricetin (FDB012724)*	Lachnospira	0.179	0.038
	Morin (FDB002736)		0.17	0.038
*Polyphenol listed as an experimentally verified substrate for one or more PUPs listed in dbPUP

## Sheet: Table S6
Table S6. Spearman correlations between polyphenol intake (mg/1000 kcal) and polyphenol utilization protein (PUP) counts. Polyphenols listed here were not experimentally verified PUP substrates listed in dbPUP. All p-values were adjusted for multiple testing (Bonferroni-Hochberg) with padj <= 0.05 shown.
Diet Resolution	Polyphenol (FooDB ID)	Genus	PUP (UniProt)	Estimate	padj
Total	Total polyphenol	Streptococcus	Alternansucrase (Q9RE05)	0.166	0.039
Compound	(E)-Resveratrol 3-glucoside (FDB002449)	Anaerostipes	Daidzein and genistein reductase (A0A0U1WKA6)	-0.355	0.014
	Luteolin (FDB013255)	Bifidobacterium	Sucrose phosphorylase (A0ZZH6)	-0.233	0.036
